# Supplementary material
Source: Springer Nature journal article supplement (https://www.springermedizin.de/resource/supplementary/13058_2012_3172_MOESM13_ESM.pdf/9703436)

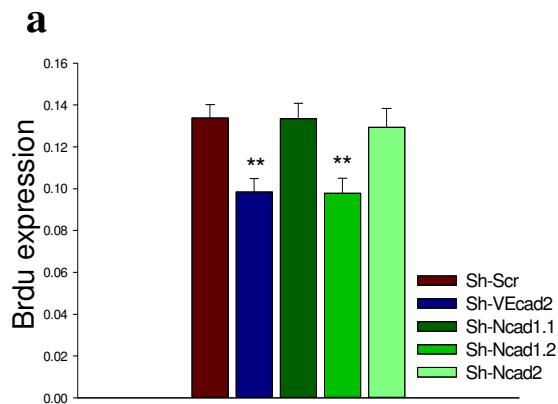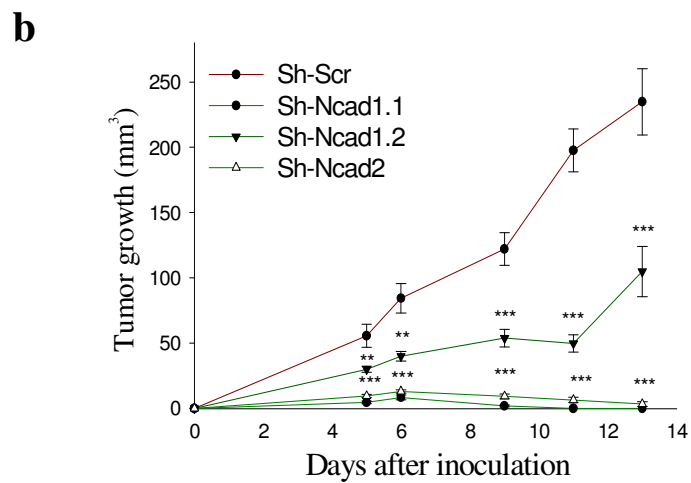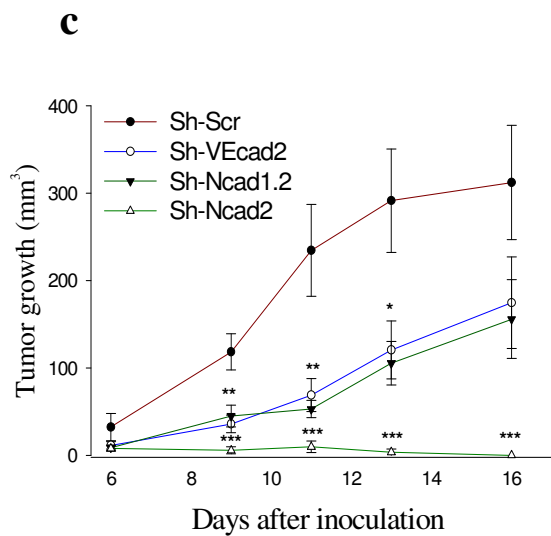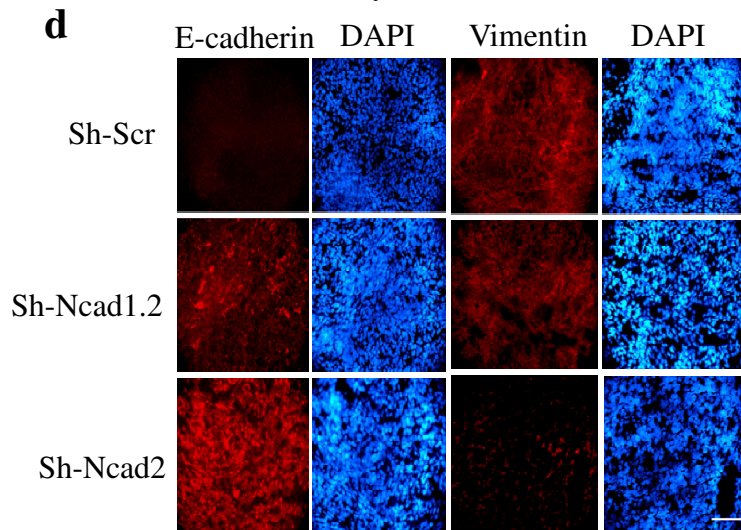

Supplement: MOESM13 [file 9703436]
